# Supplementary material
Source: MDPI journal article supplement (https://www.mdpi.com/2071-1050/11/14/3773)
Supplement: s1 [file s1]

## Supplemental Information

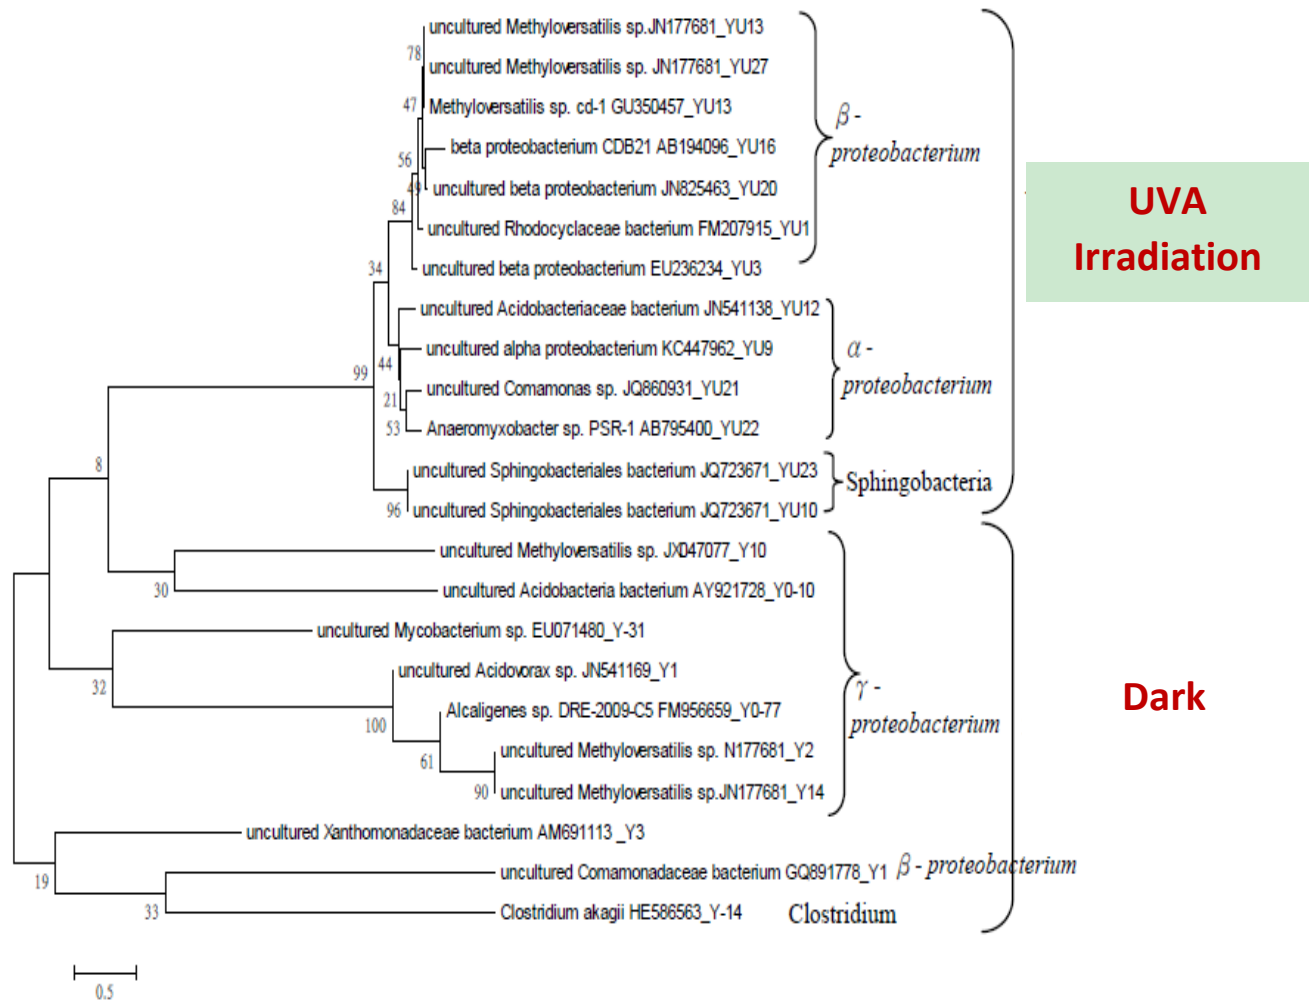

**Figure S1:** A phylogenetic tree of the cloned 16S rRNA sequences obtained from the bacterial populations present in the Yi-Li microcosms with/without the UVA irradiation.

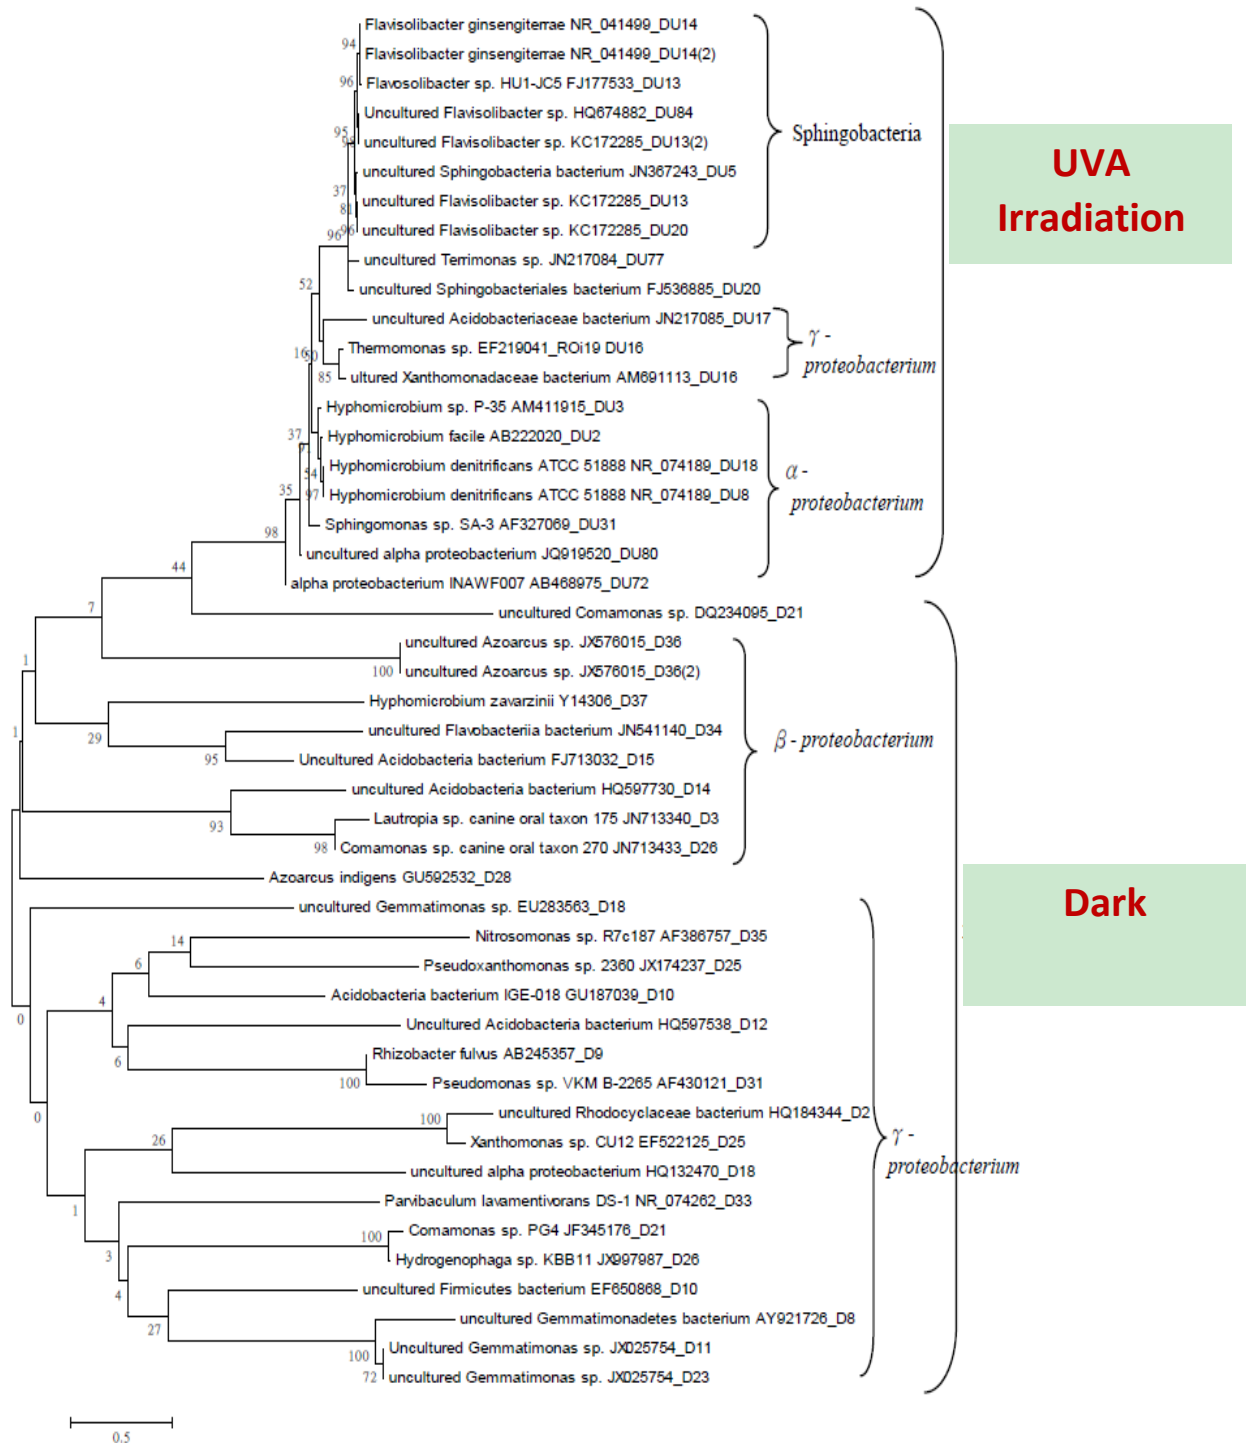

**Figure S2:** A phylogenetic tree of the cloned 16S rRNA sequences obtained from the bacterial populations present in the Da-An microcosms with/without the UVA irradiation.
